## RESEARCH ARTICLE

# Immunogene and viral transcript dynamics during parasitic *Varroa destructor* mite infection of developing honey bee (*Apis mellifera*) pupae

Ryan D. Kuster, Humberto F. Boncristiani and Olav Rueppell\*

**ABSTRACT**

The ectoparasitic *Varroa destructor* mite is a major contributor to the ongoing honey bee health crisis. *Varroa* interacts with honey bee viruses, exacerbating their pathogenicity. In addition to vectoring viruses, immunosuppression of the developing honey bee hosts by *Varroa* has been proposed to explain the synergy between viruses and mites. However, the evidence for honey bee immune suppression by *V. destructor* is contentious. We systematically studied the quantitative effects of experimentally introduced *V. destructor* mites on immune gene expression at five specific time points during the development of the honey bee hosts. Mites reproduced normally and were associated with increased titers of deformed wing virus in the developing bees. Our data on different immune genes show little evidence for immunosuppression of honey bees by *V. destructor*. Experimental wounding of developing bees increases relative immune gene expression and deformed wing virus titers. Combined, these results suggest that mite feeding activity itself and not immunosuppression may contribute to the synergy between viruses and mites. However, our results also suggest that increased expression of honey bee immune genes decreases mite reproductive success, which may be explored to enhance mite control strategies. Finally, our expression data for multiple immune genes across developmental time and different experimental treatments indicates co-regulation of several of these genes and thus improves our understanding of the understudied honey bee immune system.

**KEY WORDS:** Deformed wing virus, DWV, Immunity, Development, Honey bee health, *Apis mellifera*, Arthropod–virus interactions, Stress, Reproduction

**INTRODUCTION**

Ectoparasites can harm their hosts directly or indirectly by vectoring diseases. The vector-borne diseases and their vectors often share the common interest of attenuating the host's immune response to facilitate feeding and reproduction. Selection for an effective suppression of host immunity presumably has led to the functional integration of polydnviruses into the genome of parasitoid wasps (Herniou et al., 2013) and immunosuppressive proteins in the saliva of various ectoparasitic arthropods (Wikel, 1999; Zhao et al., 2009). Immunosuppressive effects have also been reported for *Varroa destructor* Anderson & Trueman 2000, an ectoparasitic mite that feeds on honey bee hemolymph and significantly impacts honey bee

health in conjunction with associated viruses (Rosenkranz et al., 2010; Dainat et al., 2012a; Nazzi et al., 2012; Francis et al., 2013).

Novel pathogens and pathogen combinations have been proposed as a potentially important contributor to the recent, dramatic honey bee declines (Evans and Schwarz, 2011; Comman et al., 2012). Honey bees (*Apis mellifera* L.) are the most important commercial pollinators worldwide (Potts et al., 2010; Calderone, 2012), and health declines may be due to multiple factors that differ regionally (Ellis et al., 2010; Neumann and Carreck, 2010; Williams et al., 2010; Pettis et al., 2012). However, in Europe and North America, the association between honey bee viruses and *V. destructor* features prominently among other candidate factors, such as general stress, nutrition and pesticides (Le Conte et al., 2010; Williams et al., 2010).

After its initial transmission to *A. mellifera* in southeast Asia, *V. destructor* has followed the distribution of its novel host across the world, resulting in declining natural populations and health problems in managed populations (Sammataro et al., 2000; Rosenkranz et al., 2010). The life cycle of *V. destructor* involves a phoretic dispersal phase before the female enters a brood cell of a developing honey bee to feed, lay its eggs and raise its offspring. Mite reproduction occurs in close synchrony with the development of its host (Martin, 1994). Shortly after the cell is capped, the female mite wounds the larva and establishes a feeding site that is shared with all subsequent offspring. Within the first 72 h post-capping (HPC), when the host undergoes its final pre-pupal molt, the *V. destructor* female deposits the first, male egg near the top of the cell (Ifantidis, 1983; Martin, 1994). Subsequently, the female mite deposits diploid eggs that develop into daughters approximately every 30 h. Mating occurs among siblings before emergence of all female mites from the brood cell with their adult host at the end of the bee's developmental period (Martin, 1994).

During their life cycle, *V. destructor* can effectively vector viruses and other pathogens that reside in the bees' hemolymph within and between honey bee colonies. This vertical transmission drastically changes host–pathogen dynamics and evolution (Martin et al., 2012) and may lead to fatal viral outbreaks (Nazzi et al., 2012; Neumann et al., 2012). At least 18 viruses have been described for *A. mellifera*, and *V. destructor* vectors some of the most widespread, such as deformed wing virus (DWV), sacbrood virus and acute bee paralysis virus (Chen and Siede, 2007). In association with *V. destructor*, the pathogenicity of diverse viruses may increase. For example, the symptoms of DWV infections strongly depend on the co-infection with *V. destructor* (Yang and Cox-Foster, 2005; Nazzi et al., 2012).

Most putative functions of the honey bee immune system are inferred from studies of homologous genes in *Drosophila* (Evans et al., 2006). However, several *Drosophila* immune genes are missing from *A. mellifera* (Evans et al., 2006), suggesting that some aspects of immunity may not be comparable between these taxa. The

Department of Biology, University of North Carolina at Greensboro, 1000 Spring Garden Street, 312 Eberhart Building, Greensboro, NC 27403, USA.

\*Author for correspondence (olav\_rueppell@uncg.edu)

Received 30 September 2013; Accepted 27 January 2014

functioning of the honey bee immune system in response to viral infection is particularly understudied and no response (Azzami et al., 2012), immunosuppression (Nazzi et al., 2012) or upregulation of immunogenes (Boncristiani et al., 2013) has been reported. Honey bees respond to pattern recognition of bacterial and fungal molecules through the rapid expression of antimicrobial peptides. These inducible immune-effectors include *abaecin*, *hymenoptaecin*, *apidaecin* and *defensin*, and another inducible effector is prophenoloxidase, which plays a role in melanization (Evans et al., 2006). These are presumably regulated by the main *Toll* and *Imd* immune signaling pathways, which rely on several intermediaries, such as *relish*, for signal transmission and are in turn activated by diverse pattern recognition receptors, such as *PGRP-LC*, *PGRP-S1* and *PGRP-S2* (Evans et al., 2006). However, most of these and other immune functions and genes lack direct experimental verification.

Even without a complete functional understanding of the honey bee immune system, expression assays of known immune genes have been used to study the interaction between *V. destructor*, DWV and honey bees. *Varroa* parasitism has been suggested to increase the pathogenicity of viruses by suppressing honey bee immunity (Gregory et al., 2005; Yang and Cox-Foster, 2005; Navajas et al., 2008; Nazzi et al., 2012), but the findings are difficult to interpret. Mite presence in naturally infected brood cells correlated with lower transcript abundance of *defensin* and *abaecin*, although this effect was only found when few mites were found on a developing bee and not with numerous mites (Gregory et al., 2005). Pupal mite infestation also correlated with diminished responses of multiple immune genes when adult bees were challenged by bacterial injection after emergence (Yang and Cox-Foster, 2005). However, it is unclear whether the results of this study are due to a specific immunosuppression or a general weakening of the bees. Additionally, a delayed suppression of honey bee immunity by *V. destructor* would not benefit the mites' feeding, which has been suggested as the ultimate reason for the immunosuppression (Gregory et al., 2005). Adult bees from hives with higher mite infestation levels showed decreased levels of the immune system regulator *dorsal* but the downregulation was associated with infection of DWV instead of *V. destructor* (Nazzi et al., 2012). The common association between DWV and *V. destructor* (Yang and Cox-Foster, 2005; Nazzi et al., 2012) may confound effects of *V. destructor* on honey bee immunity. In addition, an *in vitro* study of the effects of *V. destructor* infestation on developing worker bees showed increased expression of several immune genes (Gregorc et al., 2012). Thus, the immune response of the honey bee host to *Varroa* mite infection warrants further research, particularly in the context of DWV, development and quantitative mite effects.

Here, we describe such a systematic study of quantitative mite effects, simultaneously assessing DWV titers. Specifically, we attempt to capture the temporal dynamics of the three-way interactions between virus, mite and bee. We compare the gene expression of several known immune genes in experimentally mite-infected and control honey bees across the mites' reproductive development in their natural colony context. Furthermore, we describe DWV titers and mite reproductive patterns that are associated with the gene expression patterns. Our results demonstrate a nuanced response to *V. destructor* infection and demonstrate overall that mite parasitism does not result in a simple downregulation of honey bee immunity.

## RESULTS

### Mite reproduction

The manual introduction of adult phoretic mites into newly capped cells of fifth instar honey bee larvae was generally successful, with

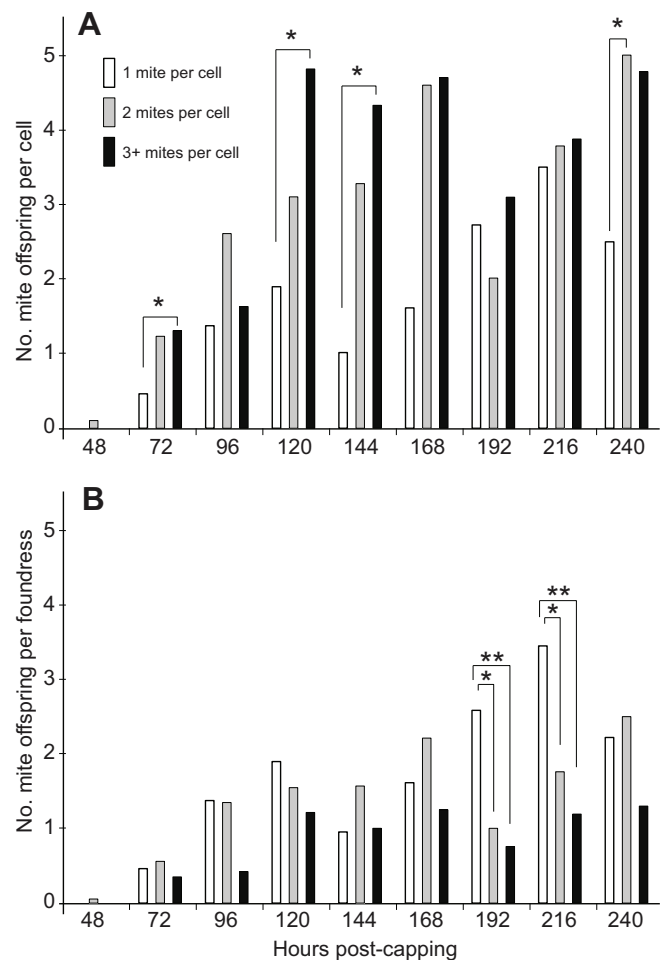

**Fig. 1. Patterns of mite reproduction demonstrated successful introduction of reproductive mites in the three mite treatment groups.** Overall, offspring production per cell (A) increases with foundress number from single introduced mites (white bars), pairs of introduced mites (grey bars) to groups of multiple introduced mites (black bars), but offspring production per foundress mite (B) decreases with the number of foundresses introduced. This apparent competition among foundresses led to stagnating offspring numbers of the second half of the reproductive cycle, while single foundresses continued to produce offspring over time (\* $P < 0.05$ , \*\* $P < 0.01$ ).

over 95% of the 740 introduced adult mites surviving until cells were opened again for sampling. Our experimental procedure also led to successful mite reproduction in most cases: for 72 HPC and all later sampling points, 77.5% of all mite-infested cells containing live adults contained at least one offspring. Overall, the number of mite offspring produced in cells increased with time, and cells that were inoculated with one foundress (single mite cells) contained fewer mite offspring than cells that were inoculated with two (double mite cells) or more (3+ mite cells) foundresses (Fig. 1A). In contrast, the number of offspring produced per foundress declined from single mite cells and double mite cells to 3+ mite cells (Fig. 1B).

### Transcript expression

Overall, the expression for all transcripts was affected by age and treatment, except for *abaecin* (Table 1). However, treatment and time significantly interacted, except for *abaecin* and DWV (Table 1), indicating different treatment effects at different time points (Fig. 2).

**Table 1. General treatment and developmental time effects on the expression levels of the studied transcripts**

| Transcript                 | Factor                 | Result                                         |
|----------------------------|------------------------|------------------------------------------------|
| <i>Abaecin</i>             | Treatment              | $F_{3,189}=0.8, P=0.476$                       |
|                            | Time point             | <b><math>F_{4,189}=9.8, P&lt;0.001</math></b>  |
|                            | Treatment × Time point | $F_{12,189}=1.3, P=0.209$                      |
| <i>Apidaecin</i>           | Treatment              | <b><math>F_{3,189}=49.9, P&lt;0.001</math></b> |
|                            | Time point             | <b><math>F_{4,189}=65.3, P&lt;0.001</math></b> |
|                            | Treatment × Time point | <b><math>F_{12,189}=9.3, P&lt;0.001</math></b> |
| <i>Defensin2</i>           | Treatment              | <b><math>F_{3,189}=13.2, P&lt;0.001</math></b> |
|                            | Time point             | <b><math>F_{4,189}=22.3, P&lt;0.001</math></b> |
|                            | Treatment × Time point | <b><math>F_{12,189}=4.3, P&lt;0.001</math></b> |
| <i>Deformed wing virus</i> | Treatment              | <b><math>F_{3,189}=33.0, P&lt;0.001</math></b> |
|                            | Time point             | <b><math>F_{4,189}=8.9, P&lt;0.001</math></b>  |
|                            | Treatment × Time point | $F_{12,189}=0.9, P=0.531$                      |
| <i>Hymenoptaecin</i>       | Treatment              | <b><math>F_{3,189}=13.7, P&lt;0.001</math></b> |
|                            | Timepoint              | <b><math>F_{4,189}=30.8, P&lt;0.001</math></b> |
|                            | Treatment × Time point | <b><math>F_{12,189}=4.7, P&lt;0.001</math></b> |
| <i>PGRP-LC</i>             | Treatment              | <b><math>F_{3,189}=9.6, P&lt;0.001</math></b>  |
|                            | Time point             | <b><math>F_{4,189}=12.4, P&lt;0.001</math></b> |
|                            | Treatment × Time point | <b><math>F_{12,189}=4.0, P&lt;0.001</math></b> |
| <i>PGRP-S1</i>             | Treatment              | <b><math>F_{3,189}=3.0, P=0.031</math></b>     |
|                            | Time point             | <b><math>F_{4,189}=9.4, P&lt;0.001</math></b>  |
|                            | Treatment × Time point | $F_{12,189}=1.8, P=0.055$                      |
| <i>PGRP-S2</i>             | Treatment              | <b><math>F_{3,189}=14.1, P&lt;0.001</math></b> |
|                            | Time point             | <b><math>F_{4,189}=32.7, P&lt;0.001</math></b> |
|                            | Treatment × Time point | <b><math>F_{12,189}=3.6, P&lt;0.001</math></b> |
| <i>PPOAct</i>              | Treatment              | <b><math>F_{3,189}=3.3, P=0.022</math></b>     |
|                            | Time point             | <b><math>F_{4,189}=16.8, P&lt;0.001</math></b> |
|                            | Treatment × Time point | <b><math>F_{12,189}=2.8, P=0.002</math></b>    |
| <i>Relish</i>              | Treatment              | <b><math>F_{3,189}=15.3, P&lt;0.001</math></b> |
|                            | Time point             | <b><math>F_{4,189}=15.9, P&lt;0.001</math></b> |
|                            | Treatment × Time point | <b><math>F_{12,189}=5.5, P&lt;0.001</math></b> |

Bold indicates statistical significance at the  $P<0.05$  level.

At 24 HPC, the wounded bees exhibited a higher expression of *abaecin* than the single-mite infected bees and of *PGRP-S1* than the control and 3+ mite infected bees. The expression of *apidaecin* and *relish* was significantly higher in the wounded bees than in any other group. The expression of *defensin*, *hymenoptaecin*, *PPOAct*, *PRGP-LC* and *PRGP-S2* was not significantly different among any treatment groups. At 72 HPC, the control group expressed *abaecin* less than the 3+ mite group and *PRGP-S2* less than the wounded and the 3+ mite groups. For *apidaecin*, *defensin*, *hymenoptaecin* and *relish*, the values of the control group were significantly lower than any other group. *PGRP-LC*, *PGRP-S1* and *PPOAct* expression levels did not show any significant treatment effects (Fig. 2).

At 120 HPC, the wounded bees expressed significantly more *PPOAct* than both mite-infected groups and more *hymenoptaecin* than the control and the single-mite groups. *Apidaecin*, *defensin*, *PGRP-LC*, *PRGP-S1*, *PGRP-S2* and *relish* were more expressed in the wounded group than in any other group. *Abaecin* expression was not significantly affected by treatment at this time point. At 192 HPC, the control group showed less expression of *apidaecin* than the wounded and the single-mite groups, less expression of *defensin* and *relish* than the single-mite infected group, and less expression of *hymenoptaecin* than both mite-infected groups. No significant differences among groups were found at 192 HPC for *abaecin*, *PPOAct*, *PGRP-LC*, *PGRP-S1* and *PGRP-S2* (Fig. 2).

At 240 HPC, *defensin* expression was significantly higher in the 3+ mite-infected bees than in any other group. *Apidaecin* expression was highest in the wounded individuals, followed by the 3+ mite, single-mite and control bees. *PGRP-S2* was more expressed in the wounded bees than in either kind of mite-infected bees, and *PGRP-*

*LC* showed higher expression in the wounded bees than in any other group. *Relish* was more expressed in the 3+ mite-infected bees than in the control or wounded bees. *PGRP-S1* was significantly more expressed in the 3+ mite-infected group than in the control. *Abaecin*, *hymenoptaecin* and *PPOAct* expression were not significantly affected (Fig. 2).

DWV titers were significantly affected by treatment at all sampling time points. At 24 HPC, the DWV titers were lower in the control group than in any other group (Fig. 3). At 72 HPC, DWV titers in the control group were lowest, followed by the wounded, single-mite and 3+ mite-infected groups. At 120 HPC, the control group was significantly lower than the 3+ mite group and at 192 HPC the control group was significantly lower than both mite groups. At 240 HPC, DWV transcripts were least abundant in the control group followed by the wounded, single-mite and 3+ mite-infected groups (Fig. 3).

The comparisons of the raw cycle threshold ( $C_t$ ) values instead of the  $\Delta C_t$  values resulted in several different outcomes (supplementary material Fig. S1), particularly with regard to the wounded bees at 24 HPC and 120 HPC. Similar differences among the experimental groups were found for transcript abundance for all genes except *relish* at 192 HPC and for all but *abaecin*, *PGRP-S2* and *relish* at 72 HPC. At 24 HPC, outcomes differed between relative and absolute quantification for all genes, at 120 HPC only *apidaecin* and *PPOAct* were consistent, and at 240 HPC, *abaecin*, *defensin*, *PGRP-LC* and *PGRP-S2* exhibited similar differences among the experimental groups. The significant increases of raw  $C_t$  values from control to wounded to the single-mite and 3+ mite-infected bees at all time points were also consistent with the results of the  $\Delta C_t$  analysis.

### Correlations among transcripts

Across all experimental groups, the relative gene expression ( $\Delta C_t$  values) of most immune genes was correlated: 30 of 36 possible pairwise correlations were significant, with correlation coefficients ranging from  $-0.02$  to  $0.72$ . A hierarchical cluster analysis grouped the three pattern recognition genes together, and suggested pairwise connections between *defensin* and *relish* and between *apidaecin* and *hymenoptaecin*, while *abaecin* and *PPOAct* were not included in any particular cluster (Fig. 4). DWV abundance was most strongly correlated to *defensin* ( $r_p=0.44, n=209, P<0.001$ ), followed by *relish* ( $r_p=0.38, n=209, P<0.001$ ) and *hymenoptaecin* ( $r_p=0.32, n=209, P<0.001$ ).

Analyses of the absolute values (raw  $C_t$  values) showed that the expression patterns of the two reference genes and all immune genes were correlated with each other ( $r_p$  ranging from  $0.15$  to  $0.76, n=209, P<0.05$ ), except for the pair *defensin*–*apidaecin* ( $r_p=-0.04, n=209, P=0.606$ ). The clustering of the genes based on their absolute transcript abundance was identical to the clustering based on  $\Delta C_t$  values (Fig. 4). DWV titers were correlated to raw  $C_t$  values of *defensin* ( $r_p=0.27, n=209, P<0.001$ ) and *hymenoptaecin* ( $r_p=0.19, n=209, P=0.007$ ), but not to the raw  $C_t$  values of the remaining immune genes or reference genes.

### Transcript abundance and mite reproduction

Overall, the relative expression levels ( $\Delta C_t$ ) of several immune genes showed significant, negative associations with the number of offspring per mite in the ANCOVA models. The strongest effects were exhibited by *relish* ( $B=-0.21, F_{1,81}=16.2, P<0.001$ ), *PGRP-S1* ( $B=-0.13, F_{1,81}=9.3, P=0.003$ ) and *hymenoptaecin* ( $B=-0.12, F_{1,81}=8.9, P=0.004$ ), followed by *apidaecin* ( $B=-0.09, F_{1,81}=8.4, P=0.005$ ), *defensin* ( $B=-0.09, F_{1,81}=5.8, P=0.019$ ) and *PPOAct*

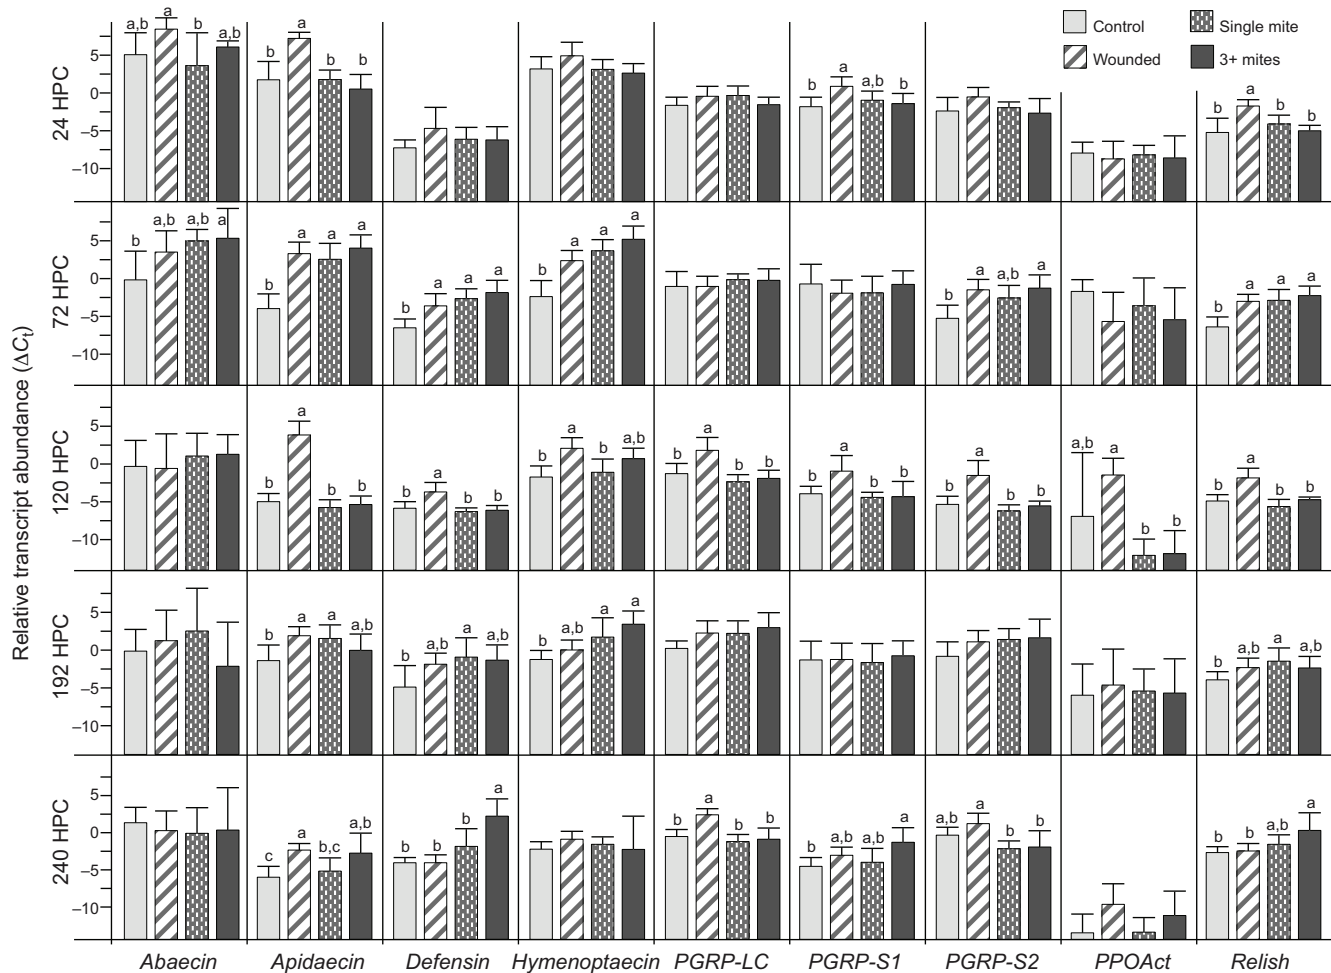

**Fig. 2. Relative expression of nine honey bee immune genes in four experimental groups across five time points showed no evidence of a consistent immunosuppression by *Varroa destructor* mites.** Immune gene responses changed over time and no general pattern emerged, but very few instances show lower gene expression in the mite groups than in both non-mite control groups. All groups consisted of developing honey bee workers in a common, natural hive environment. Controls were not manipulated except for briefly opening their brood cells. Wounded individuals were pricked with a glass capillary at the beginning of the experimental. The single mite treatment involved the experimental introduction of a single foundress mite, while three to five foundresses were introduced in the 3+ mite treatment. HPC, hours post-capping.

( $B=-0.06$ ,  $F_{1,81}=5.4$ ,  $P=0.023$ ). Analyzing time points separately, *PGRP-S1* ( $B=-0.07$ ,  $F_{1,18}=5.4$ ,  $P=0.033$ ) and *PPOAct* ( $B=-0.04$ ,  $F_{1,18}=7.2$ ,  $P=0.015$ ) showed significant effects at 72 HPC, *hymenoptaecin* ( $B=-0.23$ ,  $F_{1,16}=10.1$ ,  $P=0.006$ ) and *relish* ( $B=-0.27$ ,  $F_{1,16}=6.3$ ,  $P=0.023$ ) were significant at 192 HPC, and *apidaecin* ( $B=-0.24$ ,  $F_{1,22}=6.5$ ,  $P=0.019$ ) showed a significant association with mite reproduction at 240 HPC.

Overall, the reproductive success of introduced mites was significantly associated with the raw  $C_t$  values of *α-tubulin* ( $B=0.10$ ,  $F_{1,81}=7.5$ ,  $P=0.008$ ) and *RPS5* ( $B=0.09$ ,  $F_{1,81}=8.0$ ,  $P=0.006$ ). When time points were analyzed separately, only *RPS5* raw  $C_t$  values showed a significant association at 240 HPC ( $B=0.16$ ,  $F_{1,22}=5.4$ ,  $P=0.030$ ) and *PPOAct* at 72 HPC ( $B=-0.04$ ,  $F_{1,18}=6.9$ ,  $P=0.017$ ).

## DISCUSSION

Understanding the interactions between *V. destructor* and its honey bee hosts is crucial because of the central role of these mites in honey bee health declines (Dainat et al., 2012b; Nazzi et al., 2012; van Dooremalen et al., 2012). Our experimental design allowed us to assess the immediate impact of *V. destructor* on honey bee immune gene expression over developmental time and in a

quantitative fashion. Our findings are presumably applicable to the normal context because the experimentally introduced mites reproduced normally and their honey bee hosts experienced a typical development. Mite parasitism was quantitatively related to titers of DWV in the developing bees (Nazzi et al., 2012). However, our data showed little evidence for immunosuppression of honey bees by *V. destructor* parasitism, contrary to earlier studies (Gregory et al., 2005; Yang and Cox-Foster, 2005) but supported by more recent analyses (Aronstein et al., 2012; Gregorc et al., 2012). Instead, a complex picture of experimental effects emerged with differences among specific immune genes and time points. The gene expression patterns indicated some functional relationships among the studied immune genes and could be related to the reproductive success of *Varroa*.

Similar to other studies, our study of gene expression across developmental stages and strong experimental effects experienced the problem of identifying a good normalization method to account for methodological differences among samples. One solution is to search for suitable reference genes to normalize quantitative PCR results until specific reference genes for an experimental paradigm have been identified (Cameron et al., 2013; Reim et al., 2013).

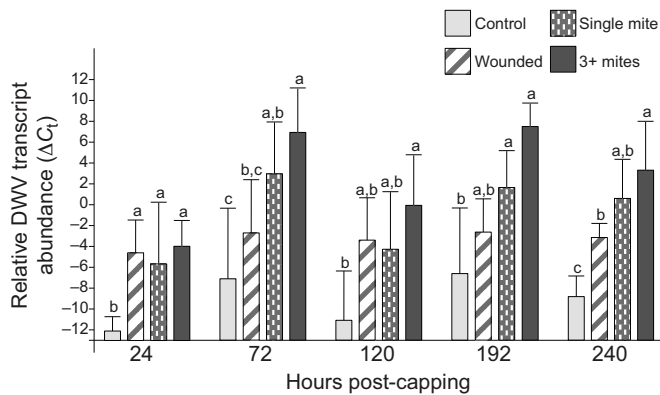

**Fig. 3. The relative abundance of deformed wing virus (DWV) was quantitatively related to *Varroa destructor* mite parasitism.** However, it did not show a further increase after 72 HPC. DWV was also more abundant in brood that had been pricked with a sterile glass capillary. These results are also apparent from absolute quantities of DWV and indicate that wounding stress alone may increase DWV titers and play a role in the pathogenicity increase of virus infections in the presence of *V. destructor* mites.

However, large sets of candidate genes may have to be studied without *a priori* information, particularly in two-factorial experimental designs that cross developmental stages (Cameron et al., 2013), such as ours. To reduce normalization bias, multiple reference genes can be combined (Lourenco et al., 2008). We evaluated multiple reference genes that have often been used in the context of honey bee immunity (Boncristiani et al., 2012; Boncristiani et al., 2013) and combined two reference genes based on our preliminary data. However, even this combined reference for calculating  $\Delta C_t$  values was significantly different among some experimental groups. As an alternative, we also analyzed our data and present the results based on raw  $C_t$  values (Boncristiani et al., 2013). However, raw  $C_t$  values of all honey bee transcripts were more correlated with each other than  $\Delta C_t$  values. Therefore, we preferentially present and discuss the relative differences of immune genes but recommend a wider set of reference genes (but see Boncristiani et al., 2013) or specific sets of reference genes (Cameron et al., 2013; Reim et al., 2013) in the future.

Regardless of the method of quantification, the experimental treatments unambiguously and consistently affected the titer of DWV in the developing bees. As reported before (Nazzi et al., 2012), a positive association between *V. destructor* mites and DWV was found and our results show that the effect is quantitative: more *V. destructor* mites parasitizing a developing bee translate into higher DWV titers. This pattern seems to be established at 72 HPC and relative and absolute DWV quantities did not increase beyond this time point. The wounding treatment with a sterile needle also increased DWV titers relative to the negative control, but not as much as the *V. destructor* introductions. It is possible that the open wounds allowed DWV entry into the bee host from the cell environment (Kanbar and Engels, 2003) or that DWV replication was increased by the wounding trauma itself (Boncristiani et al., 2013). This suggests the intriguing possibility that honey bee viruses may be activated by several different stressors (Podgwaite and Mazzone, 1986), including mite feeding. The bacterial cofactor effect reported earlier (Yang and Cox-Foster, 2005) may represent another general stressor or be due to the injection trauma itself. Thus, *V. destructor* could increase DWV by vectoring (Martin et al., 2012) and activating amplification without necessarily compromising honey bee immunity.

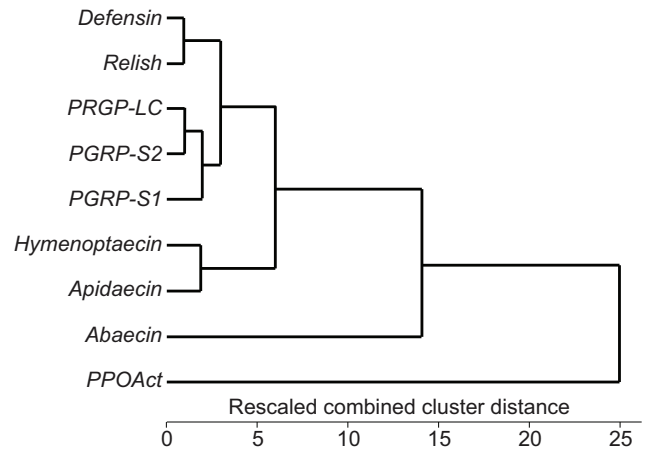

**Fig. 4. Clustering the immune genes based on co-expression patterns across the entire data set.** The three peptidoglycan-receptor proteins were recovered as one close group. However, the analysis also revealed similar expression patterns of the two effector genes *apidaecin* and *hymenoptaecin* and similarities between the signaling gene *relish* and the effector *defensin*. In the absence of detailed functional studies of the honey bee immune system, these correlational patterns provides valuable information on functional or coregulatory relations between honey bee immune genes.

The increased DWV titers with increased foundress number can be explained by either increased vectoring or multiple wounding sites (Donzé and Guerin, 1994). The persistent differences in DWV titers among the experimental groups without a consistent increase of these titers over time suggest that the initial amount of vectored DWV is important in addition to the wounding effect. No evidence for a negative association between immune gene expression and DWV titers was found, in contrast to an earlier study of adult honey bee workers (Yang and Cox-Foster, 2005), suggesting that an active suppression of DWV by the honey bee immune system is unlikely in this case. Instead, a few immune genes were positively associated with the virus titers (Boncristiani et al., 2013) and most did not show a significant association (Azzami et al., 2012). More research is needed to understand virus interactions with insect immunity (Costa et al., 2009; Flenniken and Andino, 2013).

Overall, we found little evidence for a reduced expression of the studied nine immune genes during mite infection and the effects of mite parasitism on the immune system of their honey bee hosts varied among different genes and time points. Mite-infected bees showed a consistently reduced expression only for *PGRP-S2* at 240 HPC and *PPOAct* at 120 HPC. In contrast, higher expression in the mite-infected groups than the control groups was apparent in at least two time points for *defensin*, *hymenoptaecin* and *relish*, and at 72 HPC for *abaecin*, although not all group differences were significant. The 72 HPC time point is particularly relevant because it coincides with the initiation of mite reproduction (Ifantidis, 1983). In 17 of the 45 studied cases, no significant effect of the different treatments was detected. These results contradict the initial finding of *abaecin* and *defensin* suppression by *Varroa* during bee development (Gregory et al., 2005) and are more consistent with studies reporting an upregulation or no expression change of specific honey bee immune genes in developing brood during *Varroa* parasitism (Aronstein et al., 2012; Gregorc et al., 2012). Our findings do not exclude the possibility that *Varroa* parasitism has a delayed effect on adult honey bees (Yang and Cox-Foster, 2005), but such an effect would be more likely mediated by general weakening of the individual (Aronstein et al., 2012) than by specific

immunosuppression. Expression differences between the single-mite and 3+ mite groups were significant only for defensin at 240 HPC, indicating that foundress number did not affect host immune gene expression in general.

Even though we have no direct genetic evidence that all introduced mites reproduced, our careful manual introduction of phoretic mites ensured that reproductively active *V. destructor* females entered the cells of developing honey bee hosts at the correct time. Timing is crucial for the reproductive activity of *Varroa* (Steiner et al., 1994), and a stringent time window was employed. The reproductive patterns found were comparable to natural situations (Martin, 1994; Rosenkranz et al., 2010), although our numbers may be slight overestimates because juvenile mites were counted the same as mature offspring. Similar to natural situations, we also encountered only a relatively low number of dead or non-reproductive foundresses. The data provide further evidence for competition among multiple foundresses because the individual reproductive success declined with increasing foundress number (Fuchs and Langenbach, 1989; Martin, 1995). However, overall offspring number per cell increased with higher foundress numbers, suggesting that multiple-mite infestations present a stronger drain of energy and nutrients from the developing honey bee.

Mite reproductive success was negatively correlated with the relative expression of most immune genes across all time points. These negative associations were detected despite the positive overall relationships between mites, DWV and transcript levels of immune genes by statistically controlling for treatment and time point effects. Thus, the level of immunity may influence the likelihood of mite reproduction, as has been suggested previously (Gregory et al., 2005). Alternatively, these overall effects could represent artifacts of the normalization because expression of both reference genes based on raw  $C_t$  values was positively associated with mite reproduction. However, a plausible explanation for this association does not exist. Moreover, the reference genes cannot statistically account for the association of immune gene expression and mite reproduction at specific time points. These time-specific patterns are intriguing because they suggest an early role for PPOAct, which may be explained by the wound-healing effect of prophenoloxidases that may delay sufficient feeding during the initiation of the feeding site by the foundress (Ifantidis, 1983; Steiner et al., 1994). The expression of the peptidoglycan recognition gene *PGRP-S1* was also negatively correlated with mite reproduction at 72 HPC and may be explained by a possible activation of PPOAct by *PGRP-S1*. The time point of the negative associations of PPOAct and *PGRP-S1* with mite reproductive success coincides with the first reproductive event in the mite reproductive phase (Martin, 1994). The effects do not persist, but later, mite reproduction is negatively affected by *apidaecin*, *hymenoptaecin* and *relish* expression, which are downstream members of the *Imd* immune pathway (Evans et al., 2006). The antimicrobial effector genes may have negative consequences for bacteria that grow in the *Varroa* feeding sites (Kanbar and Engels, 2003) and thus may help the wound persistence over time. In general, the phenoloxidase function is believed to act immediately while the inducible components of insect immunity may produce longer-lasting effects (Laughton et al., 2011).

We employed a positive and a negative control treatment to compare the effects of *V. destructor* mite parasitism. Although puncturing the developing honey bee with a small glass capillary has been reported to inflict wounds similar to mite feeding sites (Herrmann et al., 2005), our data show profound, long-lasting perturbations of the expression of the investigated genes. The

patterns of  $\Delta C_t$  values of immune genes relative to each other (supplementary material Fig. S2) suggested that the wounding treatment was qualitatively dissimilar from the negative control and was quite unique at 120 HPC. However, the absolute  $C_t$  values of our reference genes were significantly affected by wounding, particularly at 24 HPC and 120 HPC, resulting in increased  $\Delta C_t$  values in a number of immune genes. We did not visually assess the damage of these wounds but we may have injured the bees more severely than anticipated. The profound effect of wounding on gene expression renders them less suitable as a control. Nevertheless, it shows the importance of physical wounding and may partly explain the differences between single- and multiple-mite-infested honey bees because each foundress mite typically produces a single feeding site (Donzé and Guerin, 1994).

The expression patterns of the investigated immune genes were positively correlated with each other, a finding that was also found in adult bees, although to a more variable extent (Yang and Cox-Foster, 2005). In the absence of much experimental work to support the *Drosophila*-inferred functional relationships of honey bee immune genes (Evans et al., 2006), co-expression patterns may be useful to infer functional connections among genes (De Gregorio et al., 2001). Consistent with this conjecture, a tight association between the three peptidoglycan recognition genes resulted from our overall clustering of the gene expression patterns. In addition, close pairwise relationships between *defensin* and *relish* and between *apidaecin* and *hymenoptaecin* were revealed. The former suggests that the honey bee *defensin-1* gene depends mostly on the signaling of the *Imd* pathway (Evans et al., 2006), but a feedback loop from *defensin-1* to *relish* (Erlor et al., 2011) might also explain the observed relationship. The other pairing of the AMPs *apidaecin* and *hymenoptaecin* suggests that these two genes experience a close coregulation and are probably influenced by additional factors that do not affect *defensin-1*. *Abaecin* exhibited the most different expression pattern of the AMPs, suggesting that the regulation of this unique gene (Casteels et al., 1990) is largely independent. Among the studied genes, *PPOAct* differed most in the expression pattern, which supports the hypothesis that the phenoloxidase function is regulated independently from the inducible parts of the honey bee immune system (Evans et al., 2006; Laughton et al., 2011).

The developmental dynamics of the expression of immune genes relative to each other (supplementary material Fig. S2) illustrates the strong effect of developmental time, indicated by the results of the full-factorial model (supplementary material Table S1). However, our data do not confirm a general increase of humoral immune response genes (Evans, 2004; Laughton et al., 2011). Across the investigated time points, 120 HPC seems to have the lowest overall expression of immunogenes in the negative control and the mite groups. Wounded bees showed a more homogeneous pattern of immune gene expression across developmental time. The 120 HPC time point is close to the peak of metamorphosis, when internal reorganization of tissues, including the fat body, may require available resources, compromising immune gene expression.

## MATERIALS AND METHODS

### Mite introductions and sample collection

All experiments were carried out in three hives of mixed European descent at the University of North Carolina at Greensboro beeyard in Greensboro, NC, USA, between June and August 2011 to capture the peak production of honey bee worker brood. A clear transparency sheet was pinned to experimental frames and used to mark brood cells containing fourth instar honey bee larvae that were old enough for cell capping (De Ruijter, 1987).

**Table 2. Sample design with group specific sample sizes for the five treatment groups and 10 time points**

| Treatment                            | Hours post-capping                                                                |                                                                                   |                                                                                   |                                                                                   |                                                                                   |                                                                                   |                                                                                   |                                                                                    |                                                                                     |                                                                                     |                                                                                     |                                                                                     |                                                                                     |
|--------------------------------------|-----------------------------------------------------------------------------------|-----------------------------------------------------------------------------------|-----------------------------------------------------------------------------------|-----------------------------------------------------------------------------------|-----------------------------------------------------------------------------------|-----------------------------------------------------------------------------------|-----------------------------------------------------------------------------------|------------------------------------------------------------------------------------|-------------------------------------------------------------------------------------|-------------------------------------------------------------------------------------|-------------------------------------------------------------------------------------|-------------------------------------------------------------------------------------|-------------------------------------------------------------------------------------|
|                                      | 0                                                                                 | 24                                                                                | 48                                                                                | 72                                                                                | 96                                                                                | 120                                                                               | 144                                                                               | 168                                                                                | 192                                                                                 | 216                                                                                 | 240                                                                                 | 264                                                                                 | 288                                                                                 |
| Control                              | –                                                                                 | 8                                                                                 | 10                                                                                | 10                                                                                | 9                                                                                 | 9                                                                                 | 10                                                                                | 8                                                                                  | 9                                                                                   | 12                                                                                  | 15                                                                                  | –                                                                                   | –                                                                                   |
| Wound control                        | –                                                                                 | 10                                                                                | 10                                                                                | 10                                                                                | 12                                                                                | 11                                                                                | 10                                                                                | 10                                                                                 | 10                                                                                  | 10                                                                                  | 15                                                                                  | –                                                                                   | –                                                                                   |
| 1 mite                               | –                                                                                 | 10                                                                                | 10                                                                                | 11                                                                                | 10                                                                                | 10                                                                                | 11                                                                                | 10                                                                                 | 11                                                                                  | 10                                                                                  | 16                                                                                  | –                                                                                   | –                                                                                   |
| 2 mites                              | –                                                                                 | 11                                                                                | 10                                                                                | 9                                                                                 | 11                                                                                | 10                                                                                | 10                                                                                | 10                                                                                 | 10                                                                                  | 14                                                                                  | 11                                                                                  | –                                                                                   | –                                                                                   |
| 3+ mites                             | –                                                                                 | 10                                                                                | 10                                                                                | 10                                                                                | 11                                                                                | 11                                                                                | 10                                                                                | 10                                                                                 | 10                                                                                  | 8                                                                                   | 9                                                                                   | –                                                                                   | –                                                                                   |
| Bee developmental stage <sup>a</sup> |  |  |  |  |  |  |  |  |  |  |  |  |  |

<sup>a</sup>Illustrations have been adopted with kind permission of the Kosmos Verlag from Herold/Weiß, Neue Imkerschule © 1995 Franck-Kosmos Verlags-GmbH & Co. KG, Stuttgart, Germany.

After 6 h, the experimental frames were re-evaluated to identify larvae that had been sealed off by adult workers in the past 6 h. The cell caps of these larvae were carefully opened to randomly administer one of the following five experimental treatments before closing the cells again. Negative control larvae were left undisturbed. Larvae in a second control group received a small physical wound between the second thoracic segment and the first abdominal segment with a single-use capillary needle pulled to 50 µm diameter (Herrmann et al., 2005). Individuals in the three mite treatment groups received one, two, or three to five (3+) phoretic *V. destructor* mites. These mites were collected from nurse bees of two independent donor colonies using powdered sugar shakes (Boecking and Ritter, 1993) to ensure that mites were reproductively active foundresses (Kraus, 1993; Steiner et al., 1994). Mites were cleaned of powdered (confectioner's) sugar using a small paintbrush and water and were then transferred into brood cells using ethanol-washed insect pinning needles (Aumeier and Rosenkranz, 2001).

Pseudo-randomized subsets of experimental cells from the five treatment groups were collected at 24 h intervals over the course of 10 days following cell capping. Thus, 10 sampling groups at 24, 48, 72, 96, 120, 144, 168, 192, 216 and 240 HPC with ~10 individuals in each group ( $N_{\text{total}}=522$ ) were collected (Table 2). The larval or pupal hosts were separated from any associated mites and were placed in 1.5 ml TRIzol™ reagent (Life Technologies, Carlsbad, CA, USA), briefly homogenized with a sterilized pipette tip, and stored on dry ice until they were transferred into an ultralow-temperature freezer (–80°C) to prevent RNA degradation prior to extraction. The number of adult mites and all mite offspring, ranging from egg to pre-adult nymphal stages, was determined visually to determine mite reproductive success (Ifantidis, 1983; Rosenkranz et al., 2010).

### Sample preparation

Quantitative molecular data were collected from bees of both control and the single mite and 3+ mite treatment groups at the time points of 24, 72, 120, 192 and 240 HPC to capture the beginning, middle and end of host development as well as the initiation and end of reproduction by the foundress mite (Ifantidis, 1983).

RNA extractions were performed following the TRIzol™ protocol, following the manufacturer's recommendations (Life Technologies). Frozen samples were thawed to room temperature, vortexed for 20 to 30 s, and further homogenized using a pipette tip. After adding 300 µl of ultrapure chloroform, each sample was mixed by manual shaking for 15 s, followed by 2–3 min incubation at room temperature and centrifugation at 12,000 g for 15 min at 4°C for phase separation. The uppermost, aqueous phase containing the isolated RNA was carefully transferred into a clean microcentrifuge tube and 750 µl of 100% isopropanol was added. After 10 min of incubation at room temperature, samples were again centrifuged at 12,000 g for 10 min at 4°C. The supernatant was carefully decanted and the RNA pellet was washed with 1.5 ml of 75% ethanol before a final centrifugation at 7500 g for 5 min. The supernatant was removed and once the pellet had sufficiently air-dried, the RNA was resuspended in 50 µl RNase-free water containing 1% RNaseOUT solution (Life Technologies), heating the samples to 60°C for 15 min before storage at –80°C.

After quantification of the RNA using a Nanodrop™ spectrophotometer (Thermo Fisher Scientific, Waltham, MA, USA), samples were diluted to 500 ng µl<sup>-1</sup> using RNase-free water and an 8 µl aliquot was treated with 1 µl DNase I (2 U µl<sup>-1</sup>; Life Technologies), 1 µl DNase buffer and 0.2 µl RNaseOUT for 1 h at 37°C to remove DNA contaminants and prevent sample degradation. After 10 min at 75°C to inactivate the enzymes, reverse transcription was initiated by mixing the RNA solution with 0.02 µl poly-dT ( $n=12-18$ , 0.5 µg µl<sup>-1</sup>), 0.5 µl random hexamer mix (50 µmol l<sup>-1</sup>), 0.2 µl 2 mmol l<sup>-1</sup> dNTP and 0.298 µl H<sub>2</sub>O. The samples were heated to 65°C for 5 min and then placed on ice for 10 min to anneal the random primers. Superscript II (Life Technologies) was used for cDNA synthesis, and 4 µl buffer, 2 µl dithiothreitol, 0.5 µl enzyme (200 U µl<sup>-1</sup>) and 3.5 µl H<sub>2</sub>O were added to each sample and incubated at 42°C for 50 min, then at 70°C for 15 min to inactivate the enzyme. Finally, samples were diluted 1:5 with molecular-grade water (G-Biosciences, St Louis, MO, USA) for a total of 100 µl cDNA template for quantitative PCR (qPCR).

### qPCR

Target sequences for amplification of individual samples included constitutively expressed 'housekeeping' genes, multiple genes in the *Toll* and *Imd* pathways, antimicrobial peptides, a precursor to *ProPO*, and DWV (Table 3). These transcripts were selected from a larger list of putative immunological and pathogen targets (Evans, 2006). For these selected targets, a preliminary screening of the published primers followed by melt-curve analysis was performed to ensure specific primer binding and selective amplification of a unique target sequence.

qPCR was performed using Brilliant SYBR Green™ Master Mix (Life Technologies, Carlsbad, CA, USA). Individual reactions contained 10 µl master mix, 1 µl cDNA template, 0.5 µl forward and reverse target primers (8 µmol l<sup>-1</sup>), and 8 µl molecular-grade water. Reactions were performed in a StepOnePlus™ (Applied Biosystems) thermocycler following established protocols (Evans, 2006), with a slight adjustment to the initial holding stage and annealing temperature. The following cycling conditions were used: 3 min at 95°C, followed by 40 cycles of 95°C for 20 s, 60°C for 30 s, 72°C for 1 min, and 72°C for another 20 s, during which fluorescence measurements were taken. A final melt curve analysis was included at 95°C for 15 s, 60°C for 1 min, and a final ramp at 0.3°C to 95°C for 15 s.

### Analyses

$C_t$  values were collected based on the default StepOnePlus algorithmic threshold search criteria, using a weighted average threshold across the three plates per gene that were necessary to amplify all 209 samples. Reactions that failed to amplify the target transcript were repeated once. When two qPCR runs indicated no detection of the target, a  $C_t$  value of 45 was used instead of a missing value to include non-detection in the subsequent analyses. This surrogate value exceeded the maximum number of cycles in the reaction protocol by five to account for the fact that non-detection could be a true zero but also might represent a value just below the detection limit. Initially, raw  $C_t$  values determined from qPCR were compared across the three hives, four treatments and five time points with a mixed ANOVA.

**Table 3. Evaluated transcripts included reference genes and components of the honey bee innate and induced immunity pathways**

| Transcript (putative function)                  | NCBI ID | Forward primer          | Reverse primer        |
|-------------------------------------------------|---------|-------------------------|-----------------------|
| <i>Abaecin</i> (AMP – immune effector)          | 406144  | CAGCATTGCGATACGTACCA    | GACCAGGAAACGTTGGAAAC  |
| <i>Apidaecin</i> (AMP – immune effector)        | 406115  | TTTTGCCTTAGCAATTCCTGTGG | GTAGGTCGAGTAGGCGGATCT |
| <i>Defensin2</i> (AMP – immune effector)        | 413397  | GCAACTACCGCCTTTACGTC    | GGGTAACGTGCGACGTTTTA  |
| <i>Deformed wing virus</i> (pathogen)           | 198112  | GAGATTGAAGCGCATGAACA    | TGAATTCAGTGTGCGCCATA  |
| <i>Hymenoptaecin</i> (AMP – immune effector)    | 406142  | CTCTTGTGCGCGTTGCATA     | CGCCTCTCTGTCAATCCATT  |
| <i>PGRP-LC</i> (pattern recognition receptor)   | 408924  | TCCGTCAGCCGATGTTTTTC    | CGTTTGTGCAAAATCGAACAT |
| <i>PGRP-S1</i> (pattern recognition receptor)   | 725158  | GAGGCTGGTACGACATTGGT    | TTATAACCAGGTGCGTGTGC  |
| <i>PGRP-S2</i> (pattern recognition receptor)   | 412484  | CACAAAATCCTCCGCCATT     | ATGTCACCCCAACCCCTTCTC |
| <i>PPOAct</i> (encapsulation response effector) | 726126  | GTTTGGTTCGACGGAAGAAAA   | CCGTCGACTCGAAATCGTAT  |
| <i>Relish</i> (I $\mu$ d signaling cascade)     | 552247  | GCAGTGTGGAAGGAGCTGAA    | CAAATTCGAAAAGCGTCCA   |
| <i>RPS5a</i> (reference gene)                   | 409728  | AATTATTGGTCCGCTGGAATTG  | TAACGTCAGCAGAATGTGGTA |
| $\alpha$ - <i>tubulin</i> (reference gene)      | 550827  | GCACGTGAAGATCTAGCAGCTC  | GCACCTTCTCCTTACCTTACG |

AMP, antimicrobial peptide.

Treatment and time point effects were abundant but the hive environment did not significantly affect any transcript levels (supplementary material Table S1). Therefore, all subsequent analyses were performed on the three hives combined.

A preliminary evaluation of several potential reference genes, including  $\beta$ -*actin*, showed inconsistent melt curves or suggested pronounced expression differences between treatment groups or time points. *RPS5* and  $\alpha$ -*tubulin* were found to be most suitable, but their full-scale analysis revealed significant differences among treatment groups and time points (supplementary material Table S1). The combined average of the two reference genes also differed among experimental groups (at 24 and 120 HPC the wounded treatment was greater than all others and at 72 and 240 HPC the 3+ treatment was greater than the control). However, stability analysis with Normfinder v0.953 (Andersen et al., 2004) suggested the use of this average as reference instead of either individual reference gene. Therefore, we used the average  $C_t$  value of both selected reference genes to calculate  $\Delta C_t$  values for each of the 10 other transcripts (Antúnez et al., 2009). Without prior knowledge of the amplification efficiency, we report relative results ( $\Delta C_t$ ). In addition, we evaluated the raw  $C_t$  values (supplementary material Fig. S1) to provide absolute expression data of the transcripts based on the tentative assumption that cDNA normalization after Nanodrop™ quantification equalized all qPCR templates (Boncristiani et al., 2013). The overall expression levels of the target sequences were tested in response to time and treatment using a full two-factorial ANOVA. To test for treatment effects at specific time points, simple ANOVAs of  $\Delta C_t$  values were performed, followed by Tukey's HSD *post hoc* analysis. Pearson's product-moment correlation was performed on the raw  $C_t$  data for all 12 transcripts across the full data set to identify potential co-expression patterns.

Additionally, mite reproductive success was compared among the treatment groups and correlated to immune gene expression. Reproductive success was analyzed separately as either total offspring in a cell or a value of individual reproductive success per mite (offspring per foundress mite). All analyses concerning mite reproduction were performed only on mite-infested cells (treatment groups III–V), omitting the first two sampling time points because the initial mite offspring is produced ~60 HPC (Ifantidis, 1983; Martin, 1994). Expression values of target transcripts ( $\Delta C_t$ ) were correlated to mite reproductive success for each time point separately by ANCOVA, taking treatment into account.

#### Acknowledgements

We thank Mike Simone-Finstroem for providing advice on some of the experimental procedures. We also acknowledge the support and encouragement of the other members of the Social Insect Lab at UNCG and the North Carolina Honey Bee Research Consortium.

#### Competing interests

The authors declare no competing financial interests.

#### Author contributions

R.D.K. and O.R. conceived and designed the study; R.D.K. and H.F.B. performed the experiments; R.D.K., H.F.B. and O.R. analyzed the data, and R.D.K. and O.R. wrote the manuscript.

#### Funding

Financial support for this project was provided by the University of North Carolina at Greensboro and the Agriculture and Food Research Initiative of the USDA National Institute of Food and Agriculture [grant no. 2010-65104-20533 to O.R.].

#### Supplementary material

Supplementary material available online at <http://jeb.biologists.org/lookup/suppl/doi:10.1242/jeb.097766/-DC1>

#### References

- Andersen, C. L., Jensen, J. L. and Ørntoft, T. F. (2004). Normalization of real-time quantitative reverse transcription-PCR data: a model-based variance estimation approach to identify genes suited for normalization, applied to bladder and colon cancer data sets. *Cancer Res.* **64**, 5245–5250.
- Antúnez, K., Martín-Hernández, R., Prieto, L., Meana, A., Zunino, P. and Higes, M. (2009). Immune suppression in the honey bee (*Apis mellifera*) following infection by *Nosema ceranae* (Microsporidia). *Environ. Microbiol.* **11**, 2284–2290.
- Aronstein, K., Saldívar, E., Vega, R., Westmiller, S. and Douglas, A. E. (2012). How *Varroa* parasitism affects the immunological and nutritional status of the honey bee, *Apis mellifera*. *Insects* **3**, 601–615.
- Aumeier, P. and Rosenkranz, P. (2001). Scent or movement of *Varroa destructor* mites does not elicit hygienic behaviour by Africanized and Carniolan honey bees. *Apidologie (Celle)* **32**, 253–263.
- Azzami, K., Ritter, W., Tautz, J. and Beier, H. (2012). Infection of honey bees with acute bee paralysis virus does not trigger humoral or cellular immune responses. *Arch. Virol.* **157**, 689–702.
- Boecking, O. and Ritter, W. (1993). Grooming and removal behavior of *Apis mellifera intermissa* in Tunisia against *Varroa jacobsoni*. *J. Apic. Res.* **32**, 127–134.
- Boncristiani, H., Underwood, R., Schwarz, R., Evans, J. D., Pettis, J. and vanEngelsdorp, D. (2012). Direct effect of acaricides on pathogen loads and gene expression levels in honey bees *Apis mellifera*. *J. Insect Physiol.* **58**, 613–620.
- Boncristiani, H. F., Evans, J. D., Chen, Y., Pettis, J., Murphy, C., Lopez, D. L., Simone-Finstrom, M. D., Strand, M., Tarp, D. R. and Rueppell, O. (2013). *In-vitro* infection of pupae with Israeli acute paralysis virus suggests variation for susceptibility and disturbance of transcriptional homeostasis in honey bees (*Apis mellifera*). *PLoS ONE* **8**, e73429.
- Calderone, N. W. (2012). Insect pollinated crops, insect pollinators and US agriculture: trend analysis of aggregate data for the period 1992–2009. *PLoS ONE* **7**, e37235.
- Cameron, R. C., Duncan, E. J. and Dearden, P. K. (2013). Stable reference genes for the measurement of transcript abundance during larval caste development in the honeybee. *Apidologie (Celle)* **44**, 357–366.
- Casteels, P., Ampe, C., Riviere, L., Van Damme, J., Elicone, C., Fleming, M., Jacobs, F. and Tempst, P. (1990). Isolation and characterization of abaecin, a major antibacterial response peptide in the honeybee (*Apis mellifera*). *Eur. J. Biochem.* **187**, 381–386.
- Chen, Y. P. and Siede, R. (2007). Honey bee viruses. *Adv. Virus Res.* **70**, 33–80.
- Corman, R. S., Tarp, D. R., Chen, Y., Jeffreys, L., Lopez, D., Pettis, J. S., vanEngelsdorp, D. and Evans, J. D. (2012). Pathogen webs in collapsing honey bee colonies. *PLoS ONE* **7**, e43562.
- Costa, A., Jan, E., Sarnow, P. and Schneider, D. (2009). The Imd pathway is involved in antiviral immune responses in *Drosophila*. *PLoS ONE* **4**, e7436.
- Dainat, B., Evans, J. D., Chen, Y. P., Gauthier, L. and Neumann, P. (2012a). Dead or alive: deformed wing virus and *Varroa destructor* reduce the life span of winter honeybees. *Appl. Environ. Microbiol.* **78**, 981–987.
- Dainat, B., Evans, J. D., Chen, Y. P., Gauthier, L. and Neumann, P. (2012b). Predictive markers of honey bee colony collapse. *PLoS ONE* **7**, e32151.
- De Gregorio, E., Spellman, P. T., Rubin, G. M. and Lemaitre, B. (2001). Genome-wide analysis of the *Drosophila* immune response by using oligonucleotide microarrays. *Proc. Natl. Acad. Sci. USA* **98**, 12590–12595.
- De Ruijter, A. (1987). Reproduction of *Varroa jacobsoni* during successive brood cycles of the honeybee. *Apidologie (Celle)* **18**, 321–326.



- Donzé, G. and Guerin, P. M. (1994). Behavioral attributes and parental care of *Varroa* mites parasitizing honeybee brood. *Behav. Ecol. Sociobiol.* **34**, 305-319.
- Ellis, J. D., Evans, J. D. and Pettis, J. S. (2010). Colony losses, managed colony population decline and colony collapse disorder in the United States. *J. Apic. Res.* **49**, 134-136.
- Erler, S., Popp, M. and Lattorff, H. M. (2011). Dynamics of immune system gene expression upon bacterial challenge and wounding in a social insect (*Bombus terrestris*). *PLoS ONE* **6**, e18126.
- Evans, J. D. (2004). Transcriptional immune responses by honey bee larvae during invasion by the bacterial pathogen, *Paenibacillus* larvae. *J. Invertebr. Pathol.* **85**, 105-111.
- Evans, J. D. (2006). Beepath: an ordered quantitative-PCR array for exploring honey bee immunity and disease. *J. Invertebr. Pathol.* **93**, 135-139.
- Evans, J. D. and Schwarz, R. S. (2011). Bees brought to their knees: microbes affecting honey bee health. *Trends Microbiol.* **19**, 614-620.
- Evans, J. D., Aronstein, K., Chen, Y. P., Hetru, C., Imler, J. L., Jiang, H., Kanost, M., Thompson, G. J., Zou, Z. and Hultmark, D. (2006). Immune pathways and defence mechanisms in honey bees *Apis mellifera*. *Insect Mol. Biol.* **15**, 645-656.
- Flenniken, M. L. and Andino, R. (2013). Non-specific dsRNA-mediated antiviral response in the honey bee. *PLoS ONE* **8**, e77263.
- Francis, R. M., Nielsen, S. L. and Kryger, P. (2013). Varroa-virus interaction in collapsing honey bee colonies. *PLoS ONE* **8**, e57540.
- Fuchs, S. and Langenbach, K. (1989). Multiple infestation of *Apis mellifera* L brood cells and reproduction in *Varroa jacobsoni* Oud. *Apidologie (Celle)* **20**, 257-266.
- Gregorc, A., Evans, J. D., Scharf, M. and Ellis, J. D. (2012). Gene expression in honey bee (*Apis mellifera*) larvae exposed to pesticides and *Varroa* mites (*Varroa destructor*). *J. Insect Physiol.* **58**, 1042-1049.
- Gregory, P. G., Evans, J. D., Rinderer, T. and de Guzman, L. (2005). Conditional immune-gene suppression of honeybees parasitized by *Varroa* mites. *J. Insect Sci.* **5**, 7.
- Herniou, E. A., Hugué, E., Thézé, J., Bézier, A., Periquet, G. and Drezen, J. M. (2013). When parasitic wasps hijacked viruses: genomic and functional evolution of polydnviruses. *Philos. Trans. R. Soc. B* **368**, 20130051.
- Herrmann, M., Kanbar, G. and Engels, W. (2005). Survival of honey bee (*Apis mellifera*) pupae after trypan blue staining of wounds caused by *Varroa destructor* mites or artificial perforation. *Apidologie (Celle)* **36**, 107-111.
- Ifantidis, M. D. (1983). Ontogenesis of the mite *Varroa jacobsoni* in worker and drone honeybee brood cells. *J. Apic. Res.* **22**, 200-206.
- Kanbar, G. and Engels, W. (2003). Ultrastructure and bacterial infection of wounds in honey bee (*Apis mellifera*) pupae punctured by *Varroa* mites. *Parasitol. Res.* **90**, 349-354.
- Kraus, B. (1993). Preferences of *Varroa jacobsoni* for honey bees (*Apis mellifera* L) of different ages. *J. Apic. Res.* **32**, 57-64.
- Laughton, A. M., Boots, M. and Siva-Jothy, M. T. (2011). The ontogeny of immunity in the honey bee, *Apis mellifera* L. following an immune challenge. *J. Insect Physiol.* **57**, 1023-1032.
- Le Conte, Y., Ellis, M. and Ritter, W. (2010). *Varroa* mites and honey bee health: can *Varroa* explain part of the colony losses? *Apidologie (Celle)* **41**, 353-363.
- Lourenço, A. P., Mackert, A., Cristino, A. D. and Simoes, Z. L. P. (2008). Validation of reference genes for gene expression studies in the honey bee, *Apis mellifera*, by quantitative real-time RT-PCR. *Apidologie (Celle)* **39**, 372-385.
- Martin, S. J. (1994). Ontogeny of the mite *Varroa jacobsoni* (Oud) in worker brood of the honeybee *Apis mellifera* (L) under natural conditions. *Exp. Appl. Acarol.* **19**, 199-210.
- Martin, S. J. (1995). Reproduction of *Varroa jacobsoni* in cells of *Apis mellifera* containing one or more mother mites and the distribution of these cells. *J. Apic. Res.* **34**, 187-196.
- Martin, S. J., Highfield, A. C., Brettell, L., Villalobos, E. M., Budge, G. E., Powell, M., Nikaido, S. and Schroeder, D. C. (2012). Global honey bee viral landscape altered by a parasitic mite. *Science* **336**, 1304-1306.
- Navajas, M., Migeon, A., Alaux, C., Martin-Magniette, M., Robinson, G., Evans, J., Cros-Arteil, S., Crauser, D. and Le Conte, Y. (2008). Differential gene expression of the honey bee *Apis mellifera* associated with *Varroa destructor* infection. *BMC Genomics* **9**, 301.
- Nazzi, F., Brown, S. P., Annoscia, D., Del Piccolo, F., Di Prisco, G., Varricchio, P., Della Vedova, G., Cattonaro, F., Caprio, E. and Pennacchio, F. (2012). Synergistic parasite-pathogen interactions mediated by host immunity can drive the collapse of honeybee colonies. *PLoS Pathog.* **8**, e1002735.
- Neumann, P. and Carreck, N. L. (2010). Honey bee colony losses. *J. Apic. Res.* **49**, 1-6.
- Neumann, P., Yañez, O., Fries, I. and de Miranda, J. R. (2012). *Varroa* invasion and virus adaptation. *Trends Parasitol.* **28**, 353-354.
- Pettis, J. S., vanEngelsdorp, D., Johnson, J. and Dively, G. (2012). Pesticide exposure in honey bees results in increased levels of the gut pathogen *Nosema*. *Naturwissenschaften* **99**, 153-158.
- Podgwaite, J. D. and Mazzone, H. M. (1986). Latency of insect viruses. *Adv. Virus Res.* **31**, 293-320.
- Potts, S. G., Biesmeijer, J. C., Kremen, C., Neumann, P., Schweiger, O. and Kunin, W. E. (2010). Global pollinator declines: trends, impacts and drivers. *Trends Ecol. Evol.* **25**, 345-353.
- Reim, T., Thamm, M., Rolke, D., Blenau, W. and Scheiner, R. (2013). Suitability of three common reference genes for quantitative real-time PCR in honey bees. *Apidologie (Celle)* **44**, 342-350.
- Rosenkranz, P., Aumeier, P. and Ziegelmann, B. (2010). Biology and control of *Varroa destructor*. *J. Invertebr. Pathol.* **103 Suppl. 1**, S96-S119.
- Sammataro, D., Gerson, U. and Needham, G. (2000). Parasitic mites of honey bees: life history, implications, and impact. *Annu. Rev. Entomol.* **45**, 519-548.
- Steiner, J., Dittmann, F., Rosenkranz, P. and Engels, W. (1994). The first gonocycle of the parasitic mite (*Varroa jacobsoni*) in relation to preimaginal development of its host, the honey bee (*Apis mellifera carnica*). *Invertebr. Reprod. Dev.* **25**, 175-183.
- van Dooremalen, C., Gerritsen, L., Cornelissen, B., van der Steen, J. J. M., van Langevelde, F. and Blacquière, T. (2012). Winter survival of individual honey bees and honey bee colonies depends on level of *Varroa destructor* infestation. *PLoS ONE* **7**, e36285.
- Wikel, S. K. (1999). Tick modulation of host immunity: an important factor in pathogen transmission. *Int. J. Parasitol.* **29**, 851-859.
- Williams, G. R., Tarpy, D. R., vanEngelsdorp, D., Chauzat, M. P., Cox-Foster, D. L., Delaplane, K. S., Neumann, P., Pettis, J. S., Rogers, R. E. and Shutler, D. (2010). Colony collapse disorder in context. *Bioessays* **32**, 845-846.
- Yang, X. and Cox-Foster, D. L. (2005). Impact of an ectoparasite on the immunity and pathology of an invertebrate: evidence for host immunosuppression and viral amplification. *Proc. Natl. Acad. Sci. USA* **102**, 7470-7475.
- Zhao, R., Yu, X., Yu, H., Han, W., Zhai, L., Han, J. and Liu, J. (2009). Immunoregulatory peptides from salivary glands of the horsefly, *Tabanus pleskei*. *Comp. Biochem. Physiol.* **154B**, 1-5.
